# Supplementary material for: Prostaglandins and calprotectin are genetically and functionally linked to the Inflammatory Bowel Diseases
Source: PubMed Central journal article supplement (PMC9536535; doi:10.1371/journal.pgen.1010189), 2022-09-26

## Supplementary graphs

**Impact of the expression of all 43 IBD gene candidate ORFs on the transcriptome of THP-1 cells.** Graphs illustrating the impact observed on the transcriptome of THP-1 cells following the expression of each ORF (43 ORFs). In the first four (ZBTB40, SLC39A11, NFKB1, PTGIR), the S100A8 and S100A9 genes are labeled. For the description of graphs see *Methods section*.

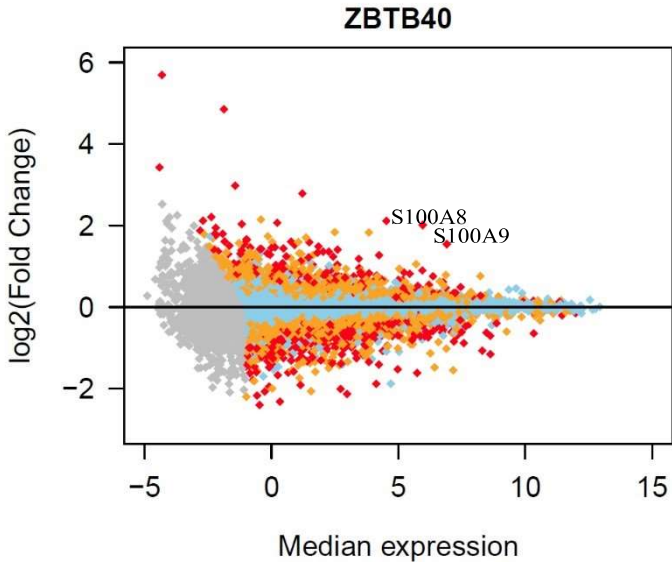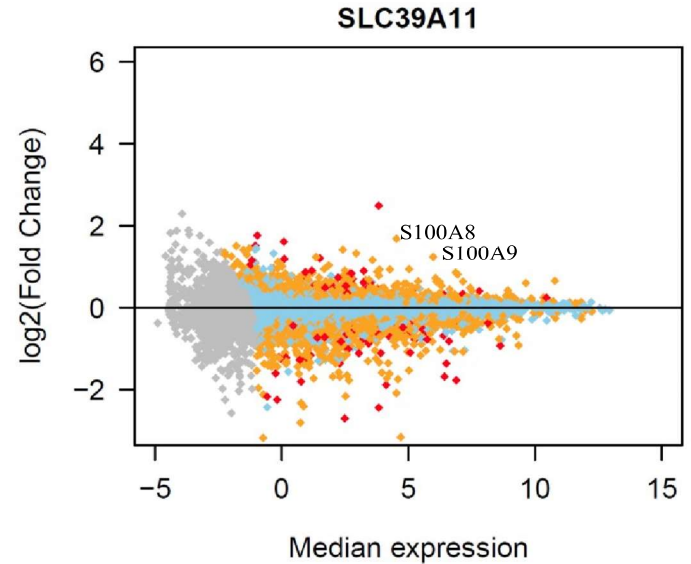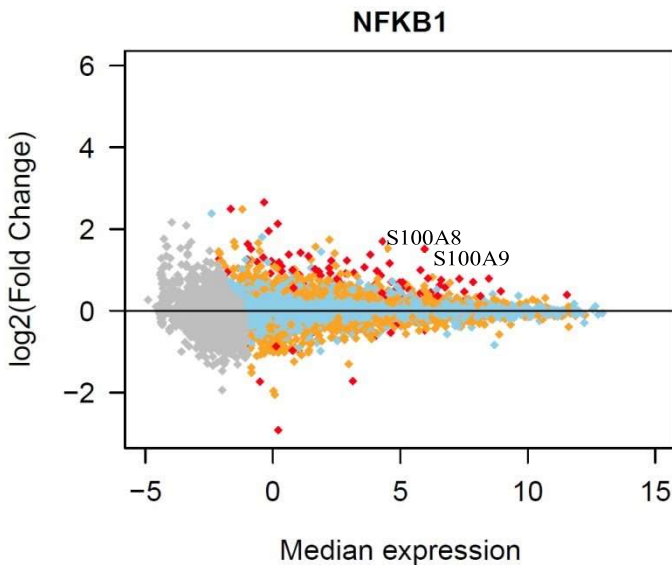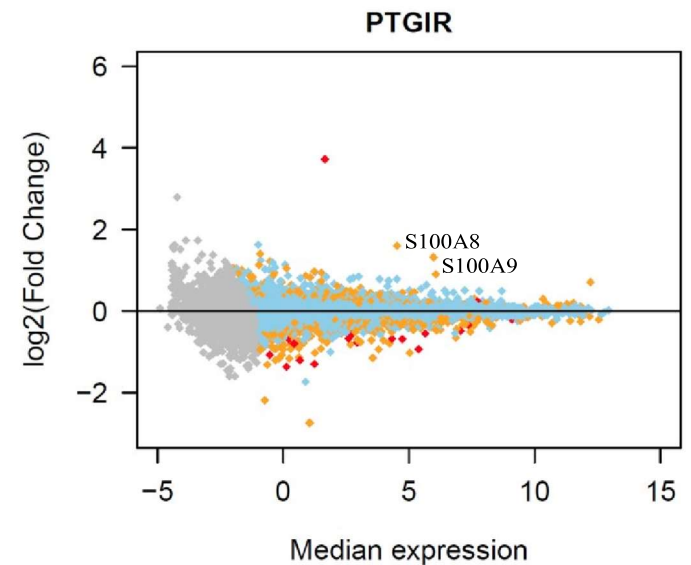

**IRF5**

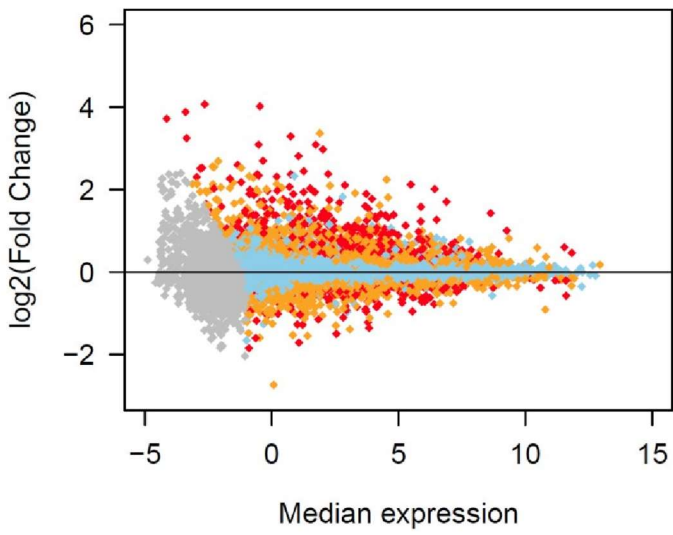

**SLC7A10**

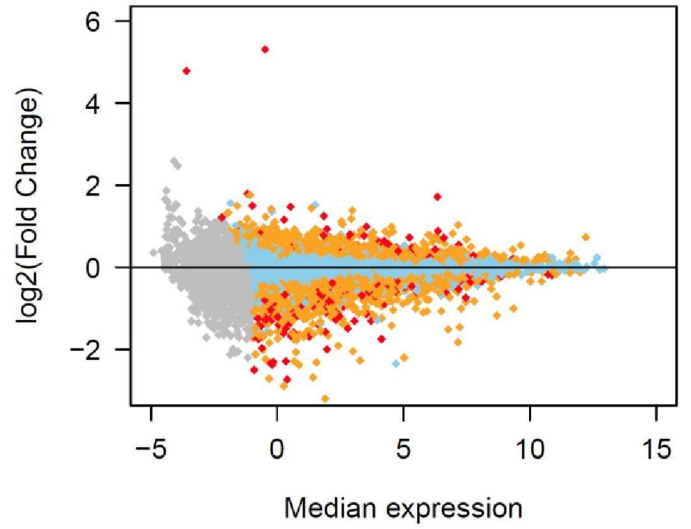

**ATG16L1**

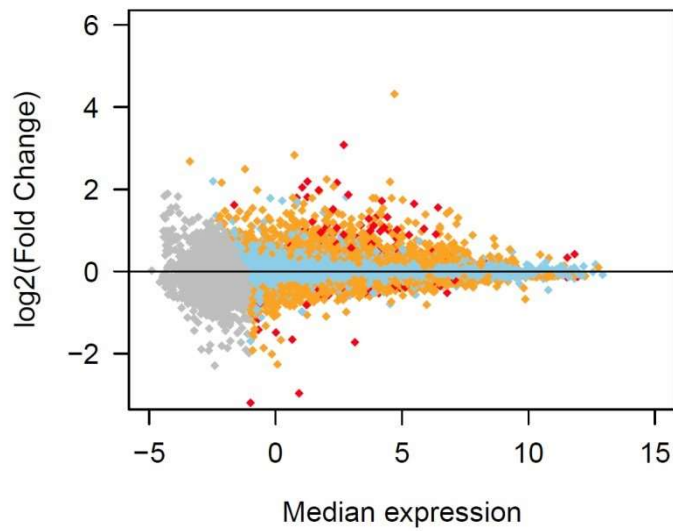

**IFIH1**

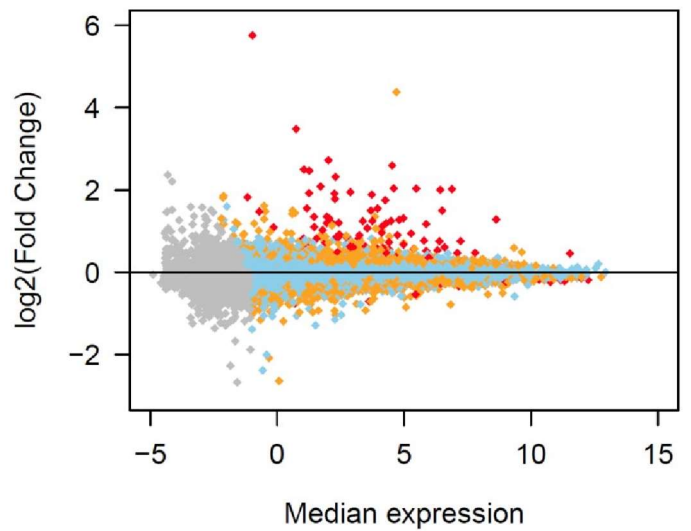

**IRF3**

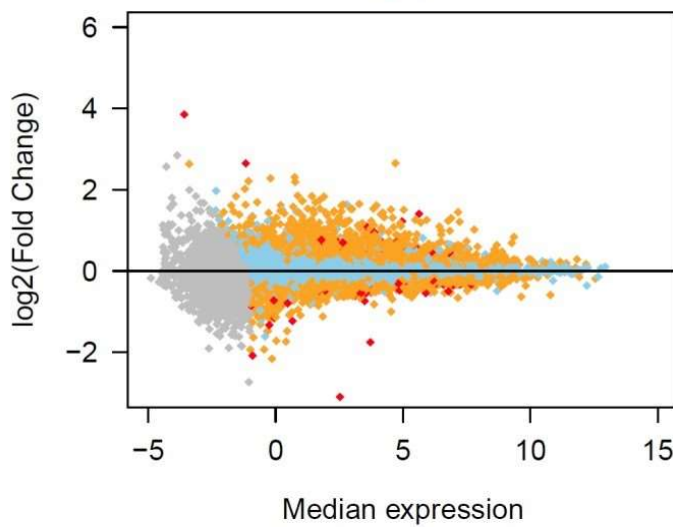

**ETS2**

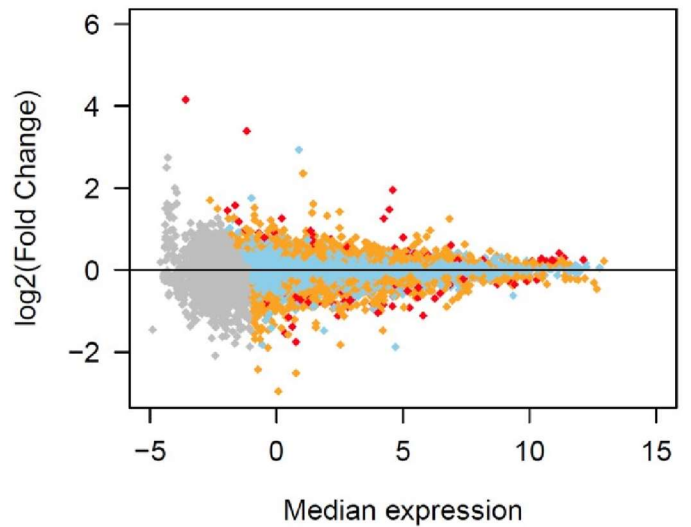

**NOD2**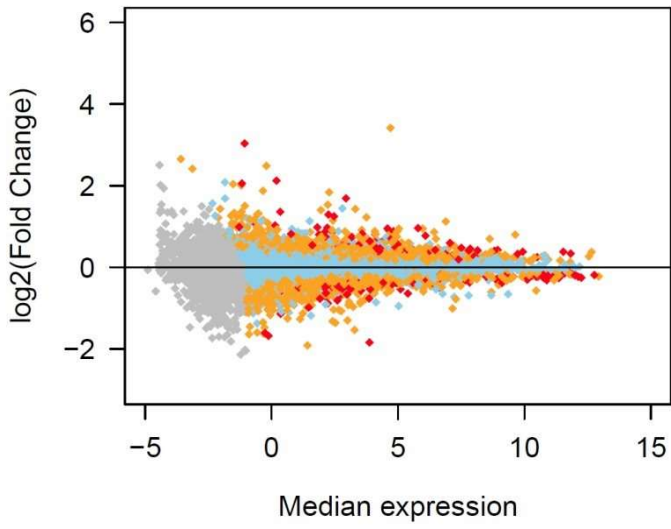**SLC22A4**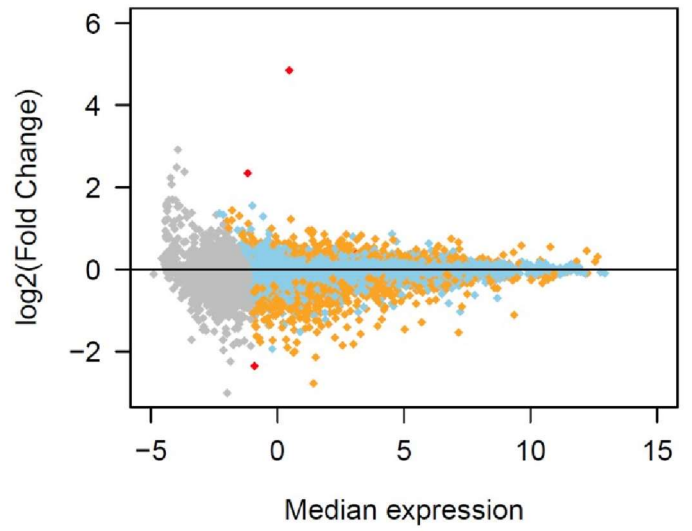**TMEM135**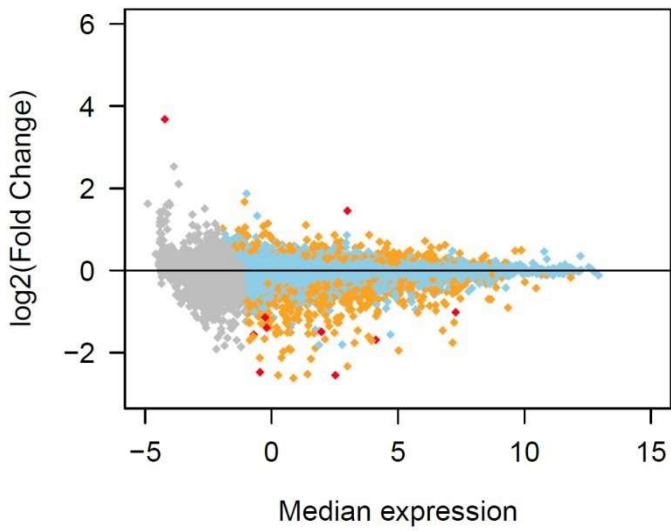**BANK1**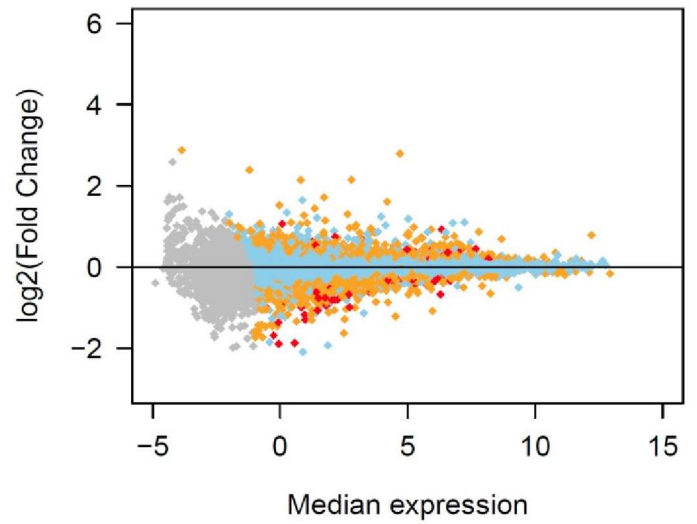**PHTF1**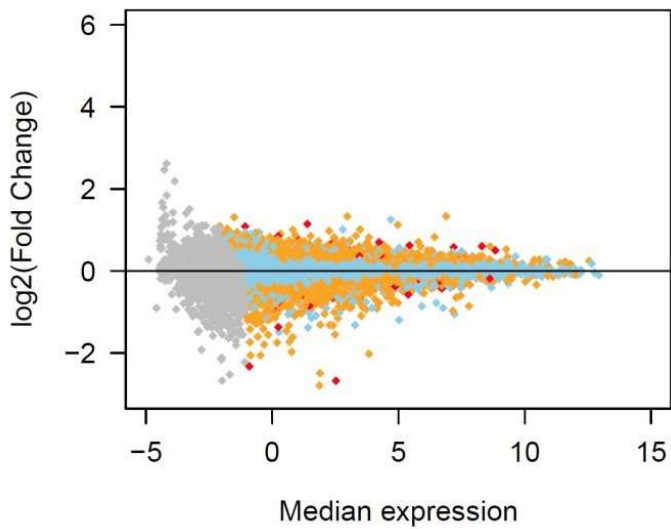**AIRE**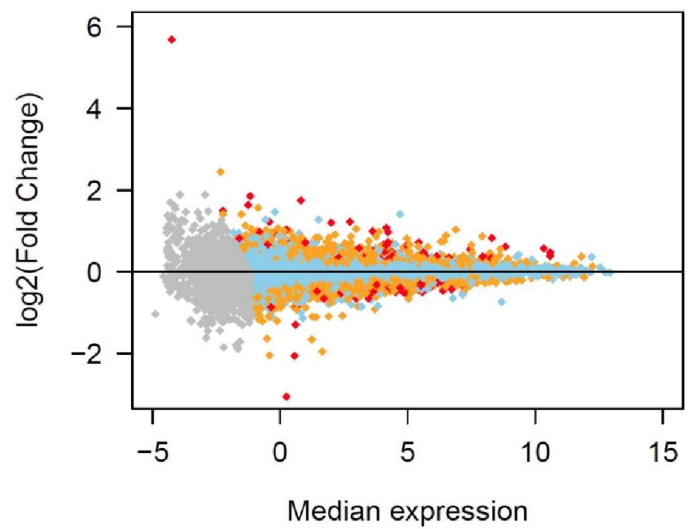

**SLC2A13**

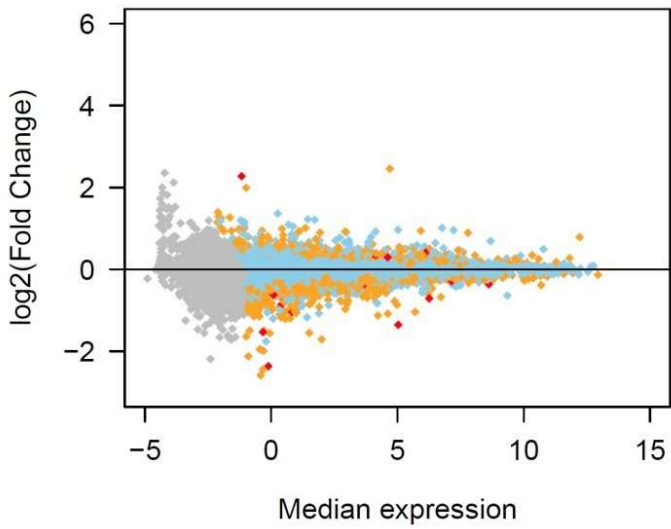

**RNFT1**

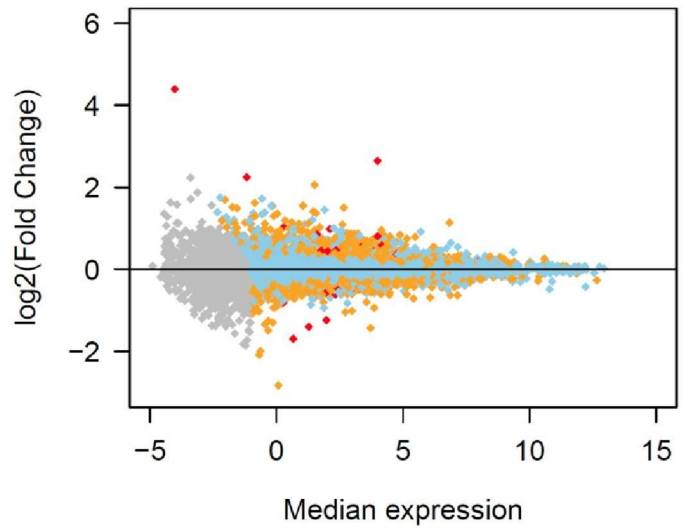

**C10orf55**

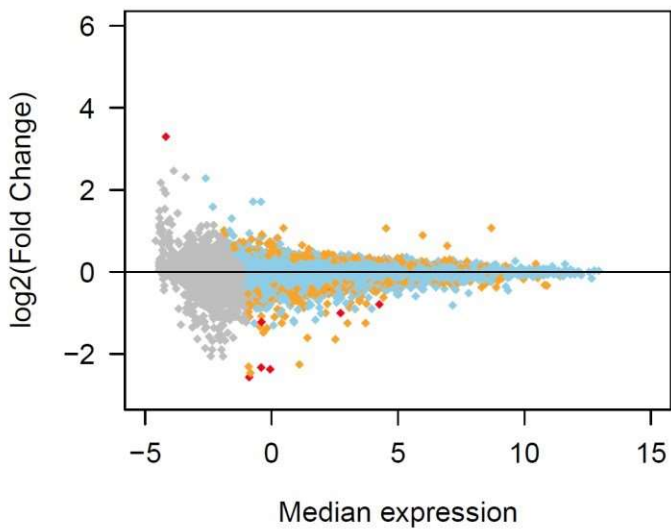

**GPR18**

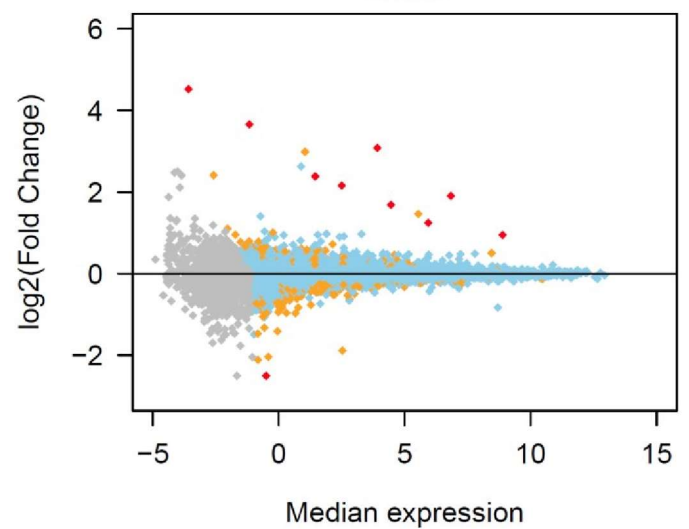

**STAT3**

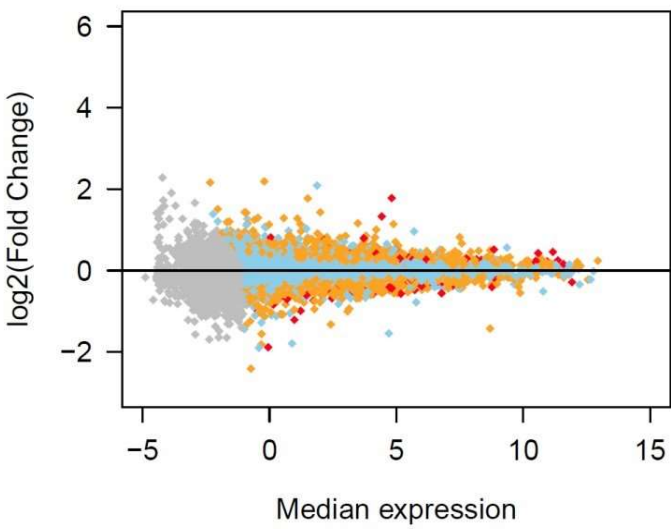

**TYK2**

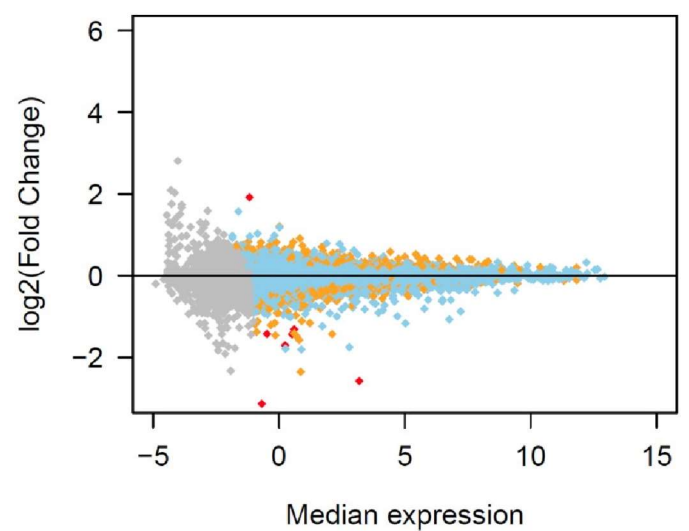

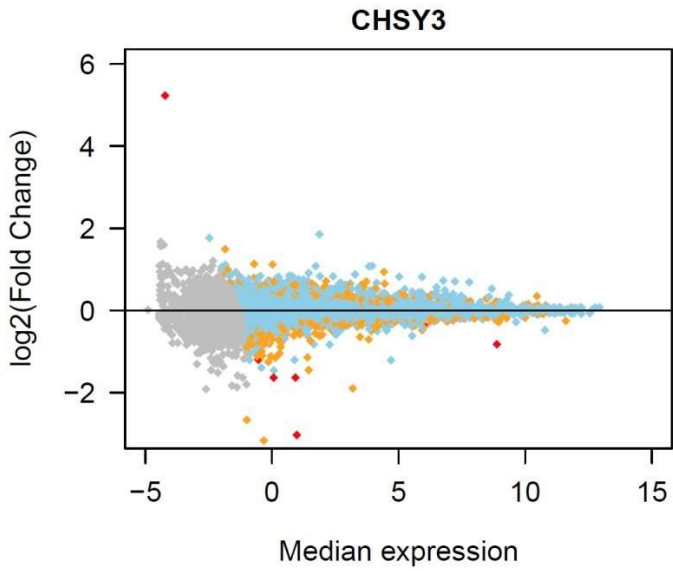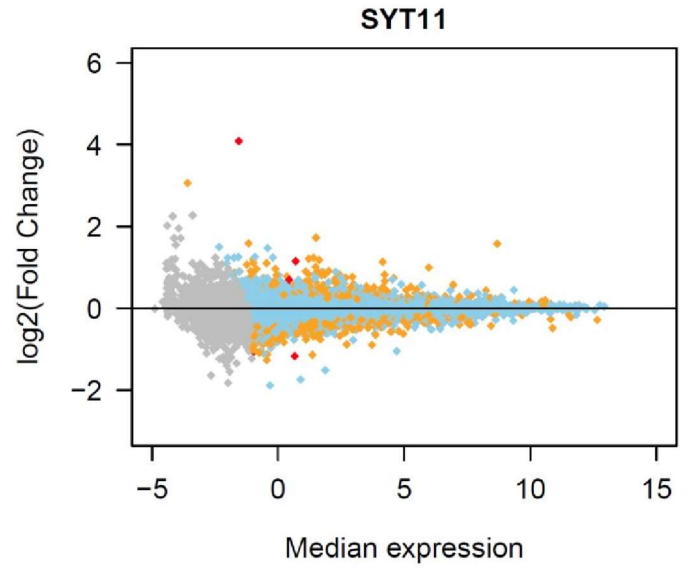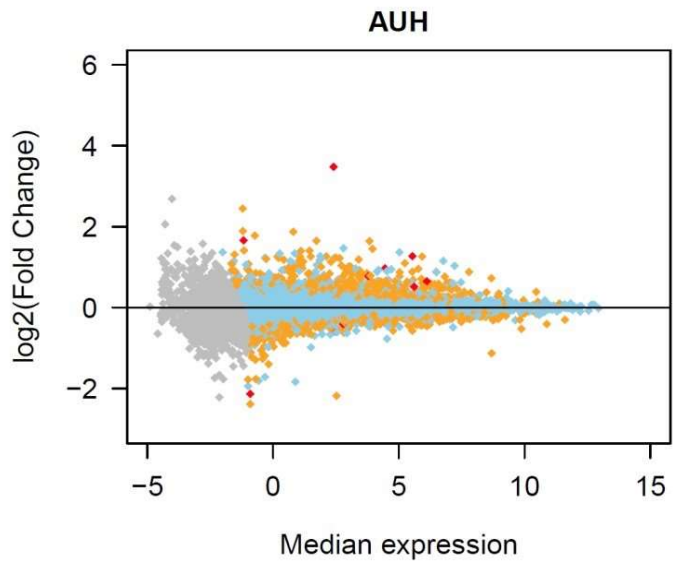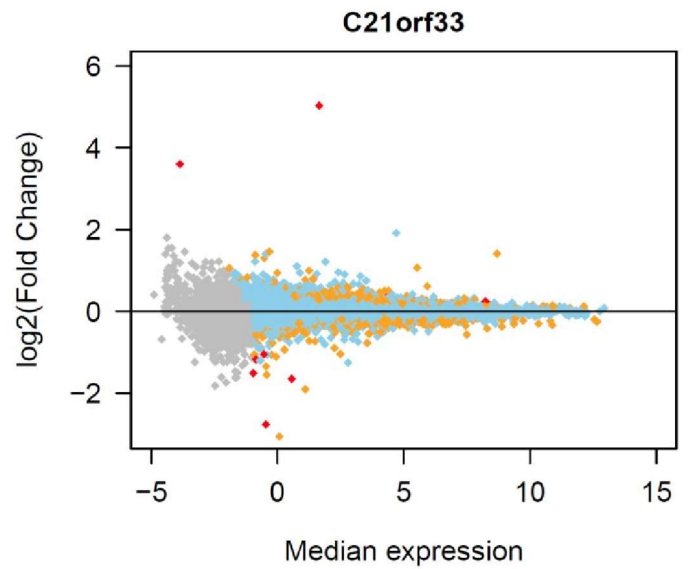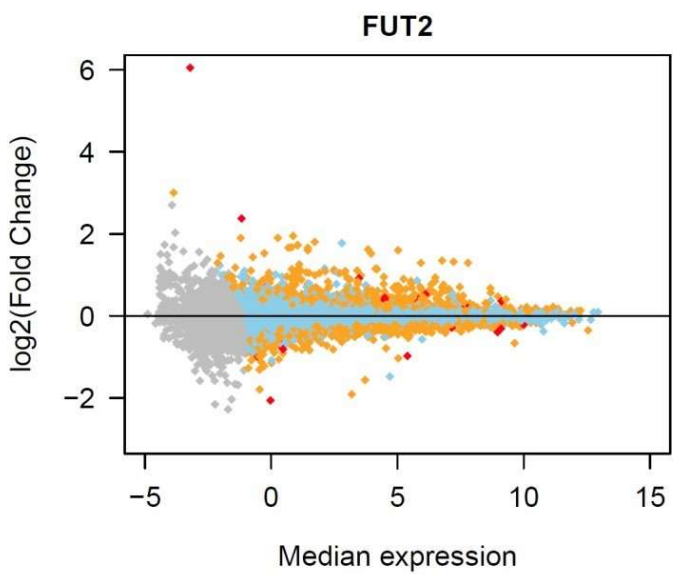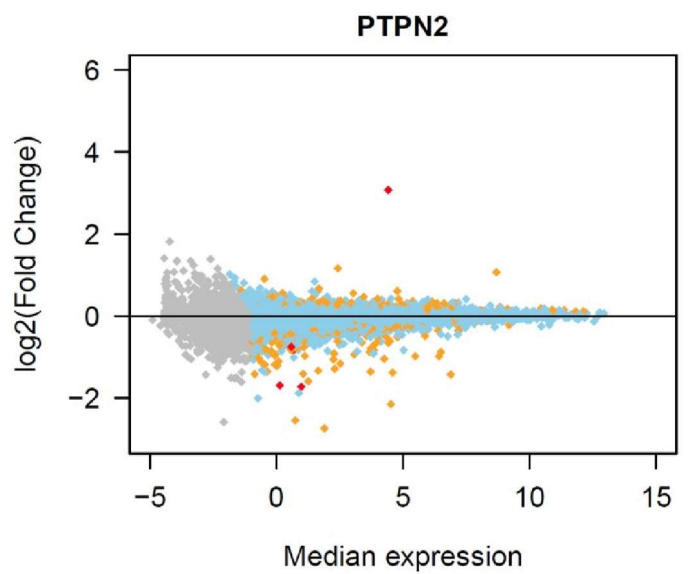



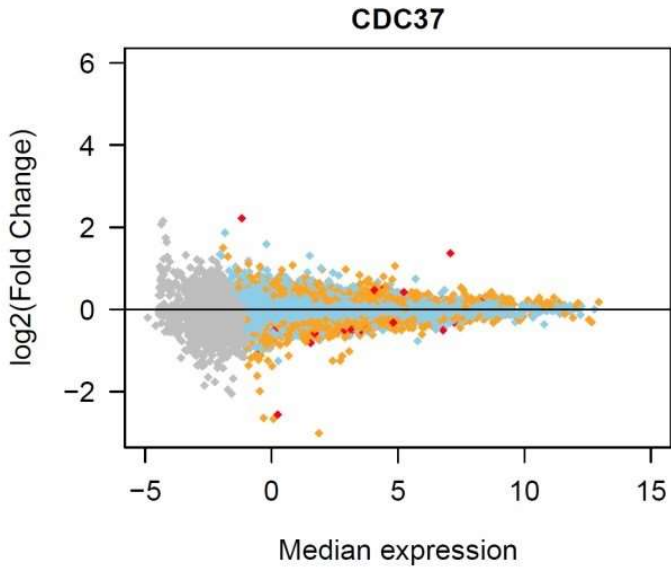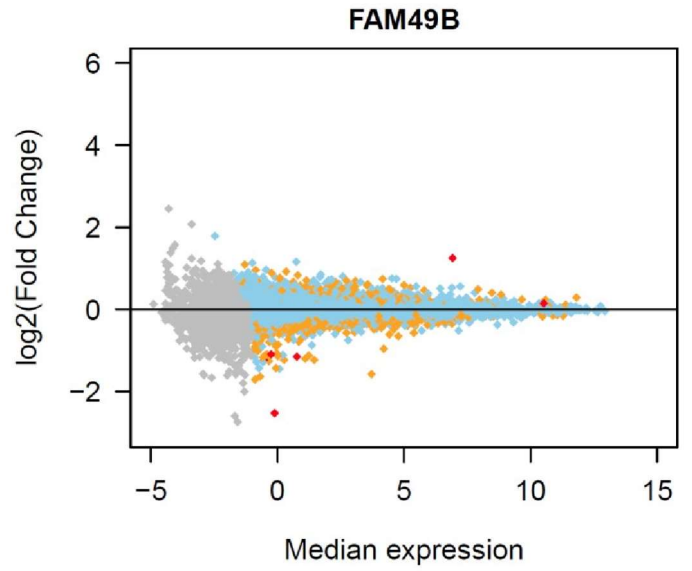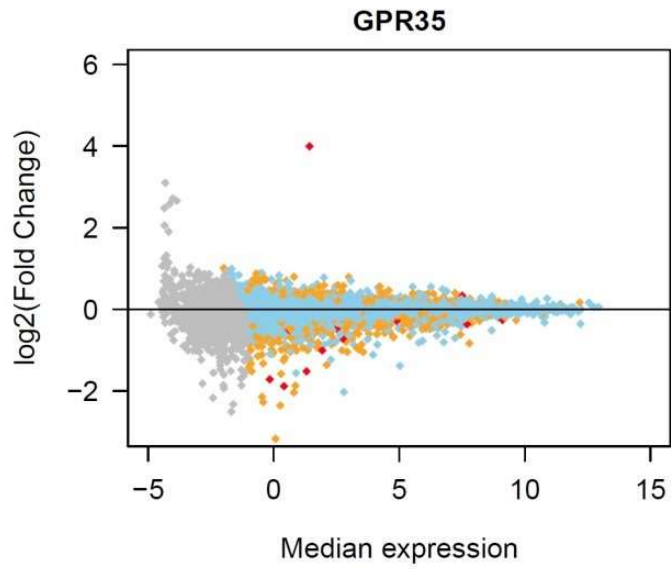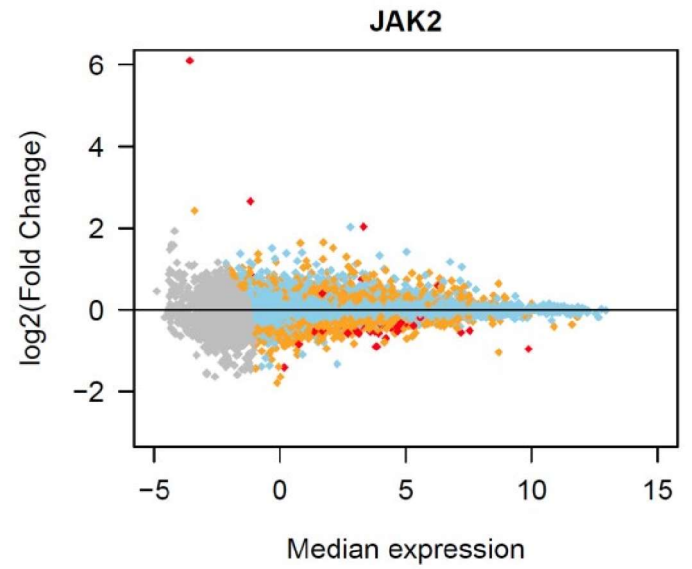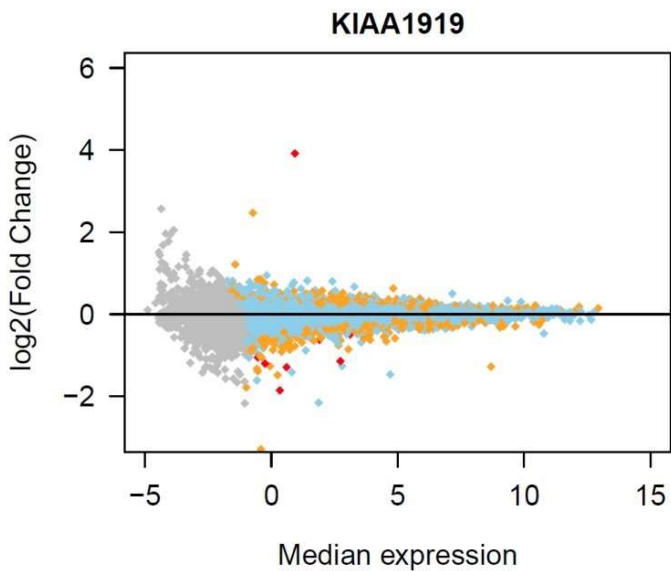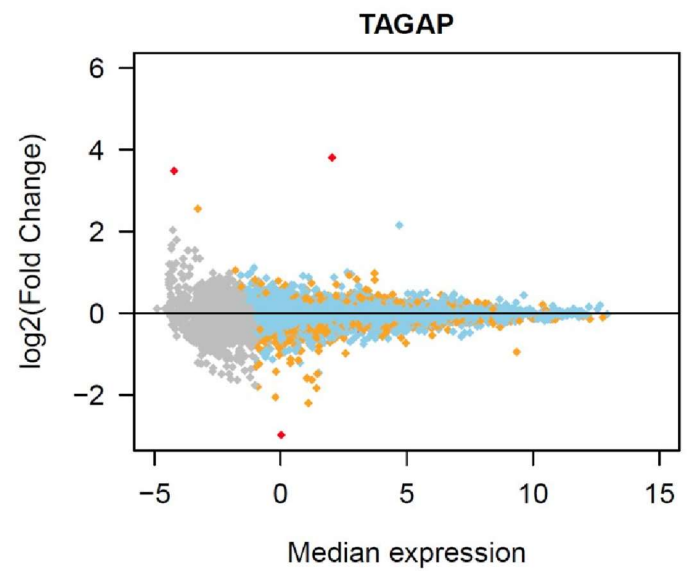

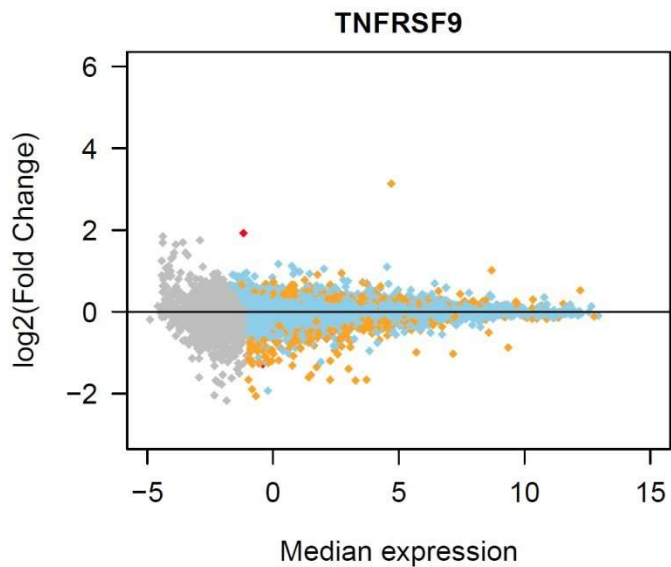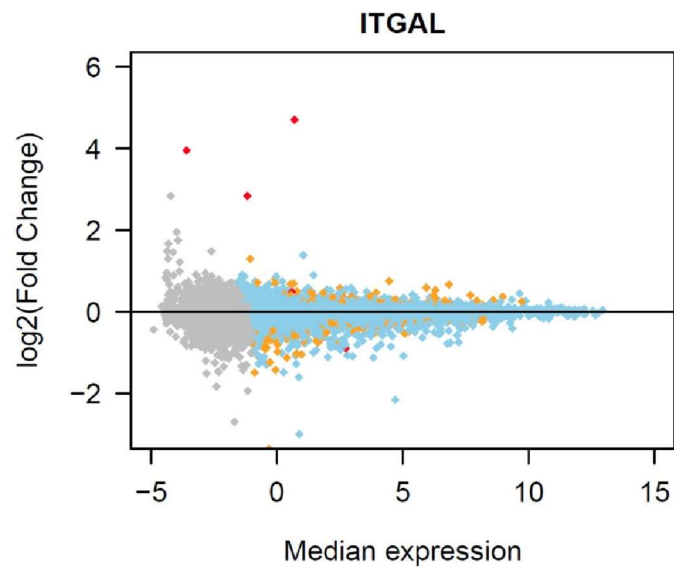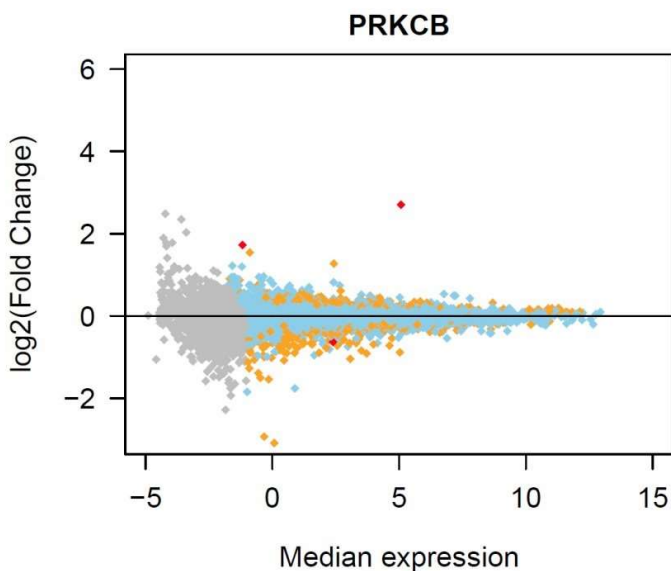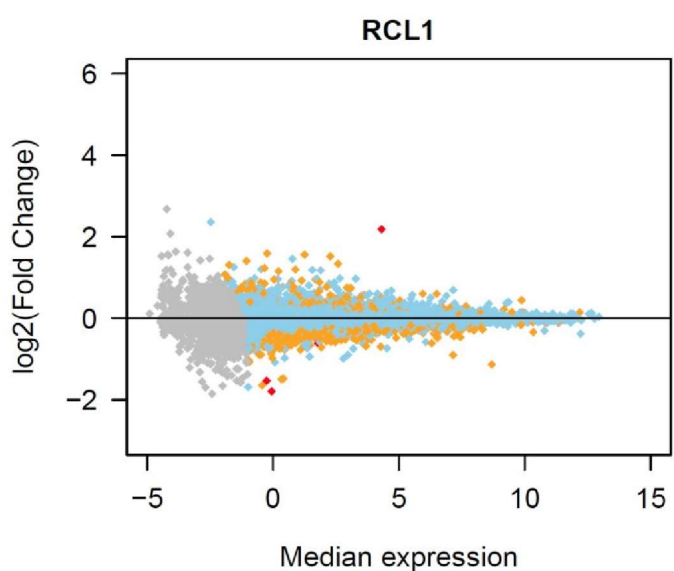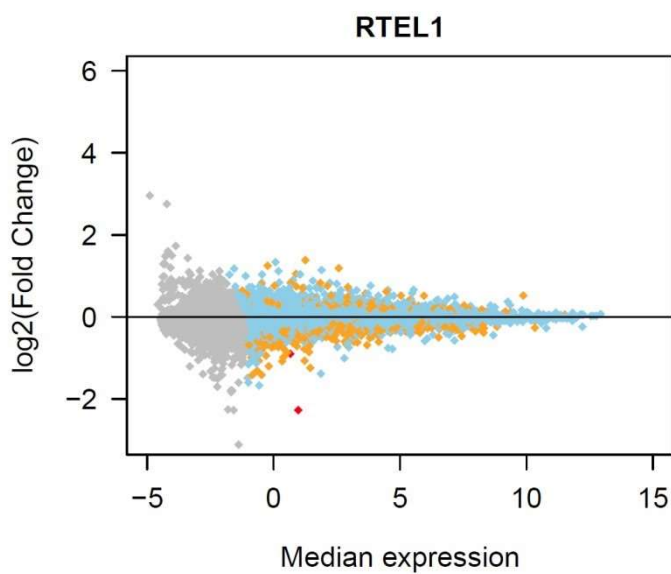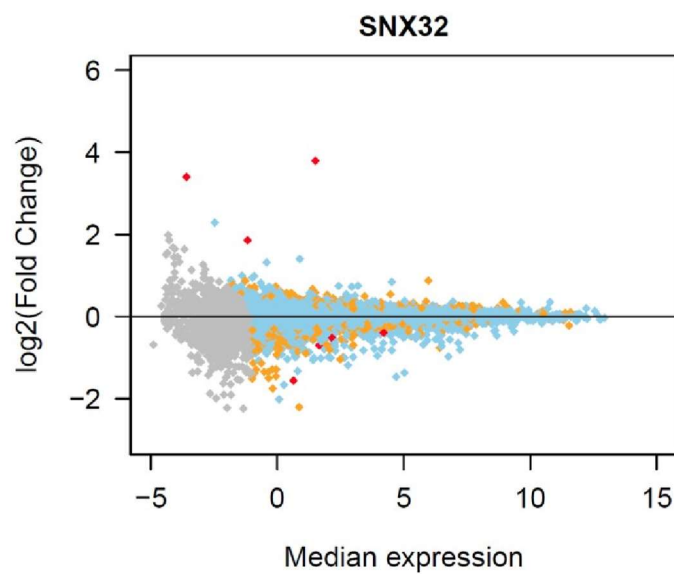

**THADA**

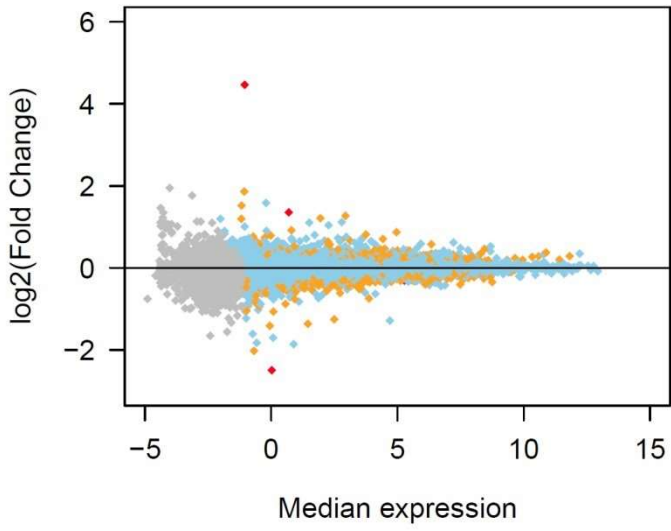

**LRRC32**

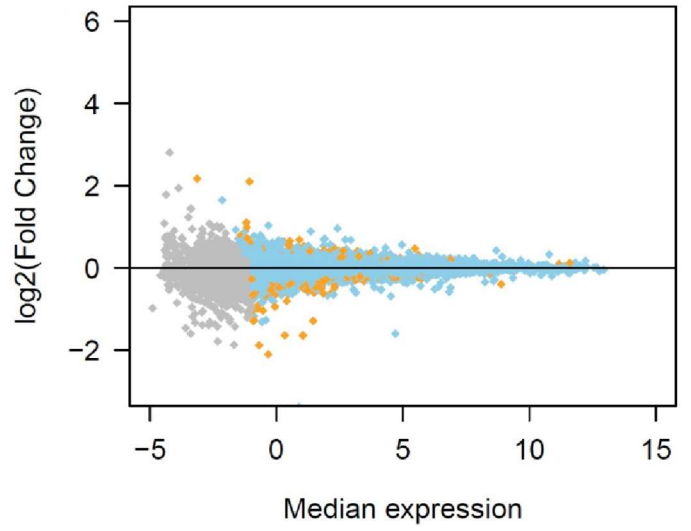

**SLC22A5**

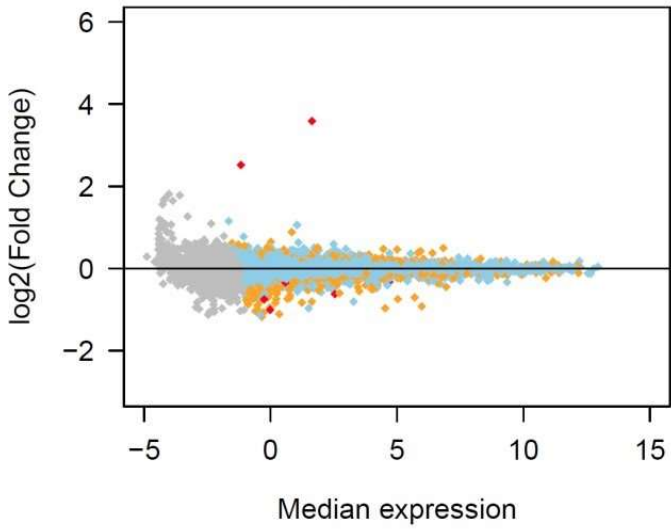

Supplement: pgen.1010189.s025.pdf [file pgen.1010189.s025.pdf]
